# Supplementary material
Source: Springer Nature journal article supplement (https://www.springermedizin.de/resource/supplementary/13075_2013_4126_MOESM3_ESM.pdf/9696124)

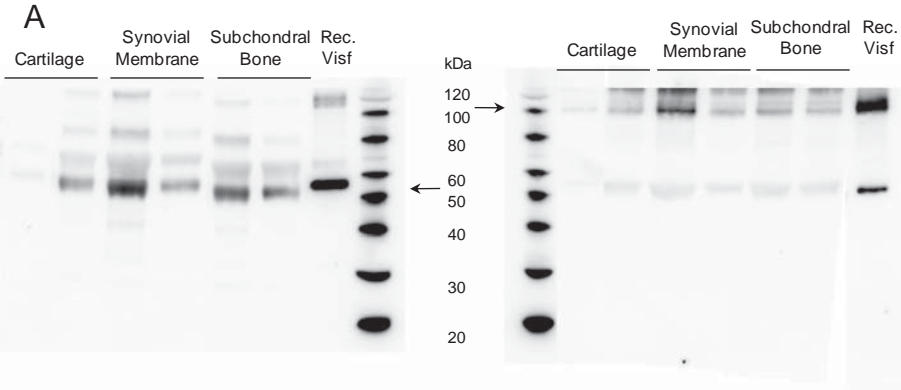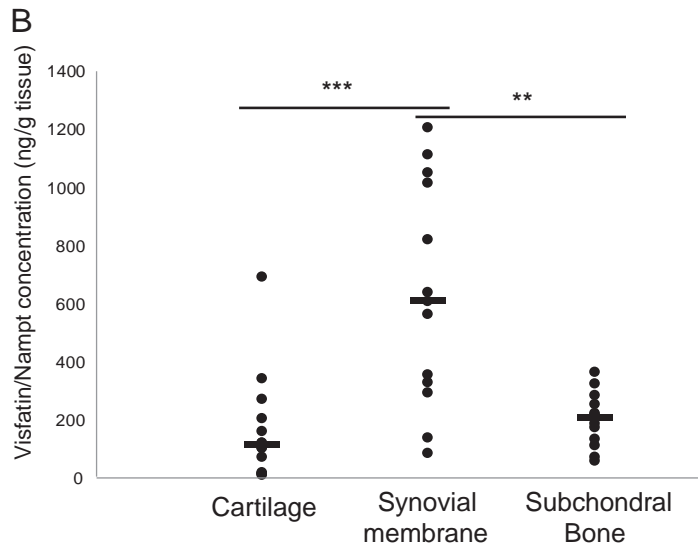

Supplement: MOESM3 [file 9696124]
